# Supplementary material for: Cloud condensation nuclei (CCN) activity analysis of low-hygroscopicity aerosols using the aerodynamic aerosol classifier (AAC)
Source: Copernicus journal article supplement (doi:10.5194/amt-15-1007-2022), 2022-02-25
Supplement: Supplementary file 1 [file amt-15-1007-2022-supplement.pdf]

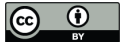

*Supplement of*

## **Cloud condensation nuclei (CCN) activity analysis of low-hygroscopicity aerosols using the aerodynamic aerosol classifier (AAC)**

**Kanishk Gohil and Akua A. Asa-Awuku**

*Correspondence to:* Akua A. Asa-Awuku ([asaawuku@umd.edu](mailto:asaawuku@umd.edu))

The copyright of individual parts of the supplement might differ from the article licence.

**Summary:** This supplemental document contains the CCNC supersaturation calibration data, calculation of necessary AAC measurement parameters, methods for uncertainty analysis of number concentration data, description of the dynamic shape factor measurement method, and DMA-based CCN measurement data and associated uncertainties.

## S1. CCN counter (CCNC) calibration

Dry particles are subjected to supersaturated conditions when passing through the CCNC column. The CCNC supersaturation is set by applying an axial temperature gradient for specified flow and pressure gradient within the CCNC column. Theoretically, the temperature gradient stays constant if the CCNC parameters are maintained constant. However, in practice there are fluctuations in the CCNC parameters which can cause deviations in the instrument supersaturation from the set supersaturation. These deviations in CCNC supersaturations were resolved by calibrating the CCNC. Calibration was performed by following the procedure described by Rose et al. (2008).

**Table S1**  $(\text{NH}_4)_2\text{SO}_4$  CCN Counter (CCNC) calibration data

| Supersaturation Setting (%) | Calibrated Supersaturation (%) | Critical Dry Diameter (nm) |
|-----------------------------|--------------------------------|----------------------------|
| 0.2                         | 0.215                          | $75.6 \pm 2$               |
| 0.3                         | 0.308                          | $61.7 \pm 0.6$             |
| 0.4                         | 0.402                          | $52.3 \pm 0.6$             |
| 0.5                         | 0.493                          | $45.5 \pm 1$               |
| 0.6                         | 0.586                          | $41.2 \pm 0.4$             |
| 0.8                         | 0.771                          | $34.7 \pm 0.7$             |
| 1.0                         | 0.957                          | $29.6 \pm 0.6$             |

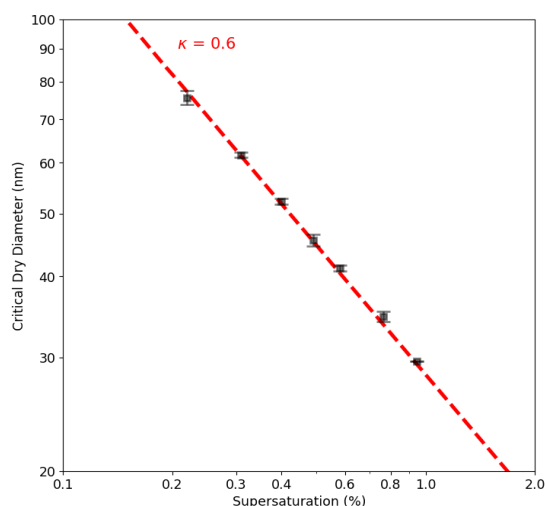

Figure S1. CCN counter (CCNC) calibration using  $(\text{NH}_4)_2\text{SO}_4$  CCN measurements from DMA-based setup. The critical dry electrical mobility diameters are plotted against their respective instrument supersaturations and are overlaid against the  $\kappa = 0.6$  line that corresponds to pure ammonium sulfate (Petters and Kreidenweis (2007)).

## S2. Estimation of AAC measurement parameters

### S2.1. Cunningham's Slip Correction Factor

Particles experience a drag force when they move along a fluid of given viscosity. Stokes' law provides a solution for estimating the viscous drag in laminar flow regimes where the Reynold's number  $\ll 1$  (Crowder et al. (2002)). An underlying assumption in the estimation of this viscous drag is that there is no slip at the particle surface when particles move through the fluid. However, this assumption starts to break down when the particle size becomes several times larger than the mean free path. In such cases, the drag force needs to be corrected for the slip to maintain a constant flow velocity. Cunningham derived a correction factor for the drag force, which is commonly expressed as a function of particle size ( $d$ ) as follows,

$$C_c(d) = 1 + \frac{\lambda}{d} \cdot \left( \alpha_{C_c} + \beta_{C_c} \cdot \exp\left(-\gamma_{C_c} \cdot \frac{d}{\lambda}\right) \right) \quad (S1)$$

where  $\alpha_{C_c} = 2.33$ ,  $\beta_{C_c} = 0.966$  and  $\gamma_{C_c} = 0.4985$  (Kim et al. (2005)).  $\lambda$  in Eq. (S1) is the mean free path of the surrounding gas particles which is estimated as follows (Eq. (S2)),

$$\lambda = \lambda_0 \cdot \left(\frac{T}{T_0}\right)^2 \cdot \left(\frac{P_0}{P}\right) \cdot \left(\frac{T_0 + S}{T + S}\right) \quad (S2)$$

where  $\lambda_0$  is the air mean free path at the reference conditions of  $67.3 \text{ nm}$ ,  $T$  is the air temperature in the classifier in  $K$ ,  $T_0$  is the reference temperature of  $296.15 \text{ K}$ ,  $P$  is the air pressure in the classifier in  $Pa$ ,  $P_0$  is the reference pressure of  $101325 \text{ Pa}$  and  $S$  is the Sutherland constant for air of  $110.4 \text{ K}$ .

### S2.2. AAC Transfer Function Characterization

The AAC transfer function includes non-ideal particle behavior using the transmission efficiency ( $\lambda_\Omega$ ) and transfer function width factor ( $\mu_\Omega$ ). The  $\lambda_\Omega$  of the AAC is empirically determined using Eq. (S4) (Johnson et al. (2018)),

$$\lambda_\Omega = \lambda_D \cdot \lambda_e \quad (S3)$$

where  $\lambda_e$  is the entrance/exit transmission efficiency of the classifier, and  $\lambda_D$  is the diffusional transmission efficiency.  $\lambda_e$  for the AAC has been typically observed as 0.8.  $\lambda_D$  is given as,

$$\lambda_D = \begin{cases} 0.819e^{-11.5\delta_{dep}} + 0.0975e^{-70.1\delta_{dep}} + 0.0325e^{-179\delta_{dep}} & \text{if } \delta_{dep} \geq 0.007 \\ 1 - 5.5\delta_{dep}^{2/3} + 3.77\delta_{dep} + 0.814\delta_{dep}^{4/3} & \text{if } \delta_{dep} < 0.007 \end{cases} \quad (S4)$$

where  $\delta_{dep}$  in Eq. (S4) is a size-dependent deposition parameter and is given as,  $\delta_{dep}(d) = \frac{L_{eff} \cdot D(d)}{Q_a}$ , such that  $L_{eff}$  is the effective deposition length of the AAC and has a value of  $46\text{m}$ ,  $D(d)$  is the size-dependent diffusion coefficient of the particles, and  $Q_a$  is the aerosol flow rate.

### S3. Sigmoidal fitting for size-resolved activation ratio

The critical dry diameter ( $D_{p,50}$ ) for an aerosol at a given supersaturation is determined with the help of the size-resolved activation ratio (denoted by  $\frac{N_{CCN}}{N_{CN}}$ ). The  $\frac{N_{CCN}}{N_{CN}}$  for a single-component aerosol population is known to fit a sigmoidal function with one plateau. The half-maximum point of the sigmoidal fit then corresponds to the  $D_{p,50}$  of the aerosol at the given supersaturation. A 4-parameter sigmoidal function was applied to the  $\frac{N_{CCN}}{N_{CN}}$  v/s  $D_p$  measurements of sucrose at different supersaturations to calculate their respective  $D_{p,50}$ . The sigmoidal function used fit the data is shown as Eq. S5.

$$\frac{N_{CCN}}{N_{CN}} = \frac{A_1 - A_2}{1 + e^{(D_p - D_{p,50})/dx}} - A_2 \quad (\text{S5})$$

$A_1$  and  $A_2$  are the minimum and maximum of the sigmoid respectively,  $dx$  is the slope of the sigmoid. The sigmoid is fit was scaled over a range of 0.0 to 1.0, i.e.,  $A_1$  and  $A_2$  were set to 0 and 1, respectively.

### S4. Uncertainty estimation for size-resolved counting and activation measurements

If  $N$  generally denotes the particle counts from a CPC or CCNC, and  $Q_a$  denotes the aerosol flow rate, the relative uncertainty in the measured particle concentration ( $\epsilon_C$ ) is determined from the relative counting uncertainty ( $\epsilon_N$ ) and the relative flow rate uncertainty ( $\epsilon_{Q_a}$ ) as follows (Moore et al. (2010)),

$$\epsilon_C^2 = \epsilon_N^2 + \epsilon_{Q_a}^2 \quad (\text{S6})$$

*Particles are assumed* to be randomly distributed throughout the sample. Poisson statistics can be used to estimate  $\epsilon_N$  as  $\frac{\sigma_N}{N} \approx N^{-1/2}$ . For the CCN counter (CFSTGC), the  $\epsilon_{Q_a}$  is generally  $\sim 4\%$ . For the TSI CPC 3776,  $\epsilon_{Q_a}$  is about  $2\%$ . The uncertainties in the particle concentrations can be used to propagate the uncertainties in the size-resolved activation ratio ( $R_a = \frac{C_{CCN}}{C_{CN}}$ ). The uncertainties in size-resolved activation ratio ( $\epsilon_{R_a}$ ) can be denoted as,

$$\epsilon_{R_a}^2 = \epsilon_{C_{CCN}}^2 + \epsilon_{C_{CN}}^2 = \epsilon_{N_{CCN}}^2 + \epsilon_{N_{CN}}^2 + \epsilon_{Q_{CCN}}^2 + \epsilon_{Q_{CN}}^2 \quad (\text{S7})$$

$$\epsilon_{R_a}^2 = N_{CCN}^{-1/2} + N_{CN}^{-1/2} + \epsilon_{Q_{CCN}}^2 + \epsilon_{Q_{CN}}^2 \quad (\text{S8})$$

Eq. (S7) can be simplified to Eq. (S8). Under standard experimental conditions, for most atmospherically relevant CN concentrations,  $\epsilon_{C_{CN}}$  is 7% or less, while  $\epsilon_{C_{CCN}}$  is less than 17%. The subsequent  $\epsilon_{R_a}$  is less than 18% (Moore et al. (2010)).

## S5. Shape factor measurements

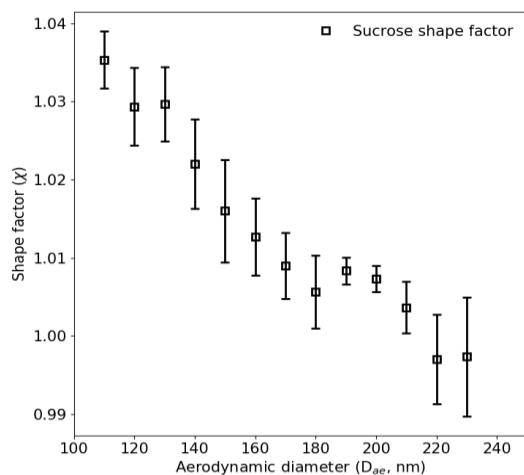

Figure S2. Sucrose dynamic shape factor data for sucrose, collected using an AAC-DMA setup (Tavakoli and Olfert (2014)). The size-resolved shape factor is plotted against the aerodynamic diameter measurements of sucrose.

Shape factor relates aerosol density with the particle size and was used to derive volume equivalent diameters corresponding to the respective aerodynamic diameters (details in sections 3 and 4 of main text). The above figure shows that the shape factor of sucrose is close to 1 over a range of sizes, which implies that sucrose particles are mostly spherical.

## S6. DMA-CCNC measurements

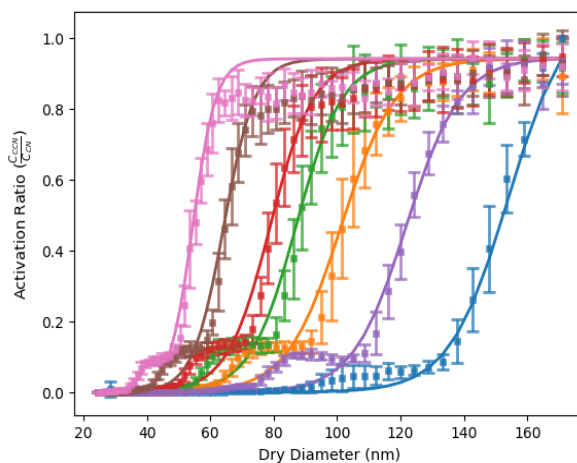

Figure S3. Size-resolved activation data of sucrose determined using CCN measurements using a DMA-based setup. The activation ratios are shown with respect to electrical mobility diameters.

**Table S2 Sucrose DMA-based CCN Activation Data. Uncertainties in Critical Dry Diameters Using Electrical Mobility Measurements from a DMA-based Setup**

| Instrument Supersaturation (%) | Critical Dry Diameter (nm) | Uncertainties in Critical Dry Diameters (%) |
|--------------------------------|----------------------------|---------------------------------------------|
| <b>0.215</b>                   | 153.3                      | $\pm 7.42$                                  |
| <b>0.308</b>                   | 122.3                      | $\pm 7.11$                                  |
| <b>0.402</b>                   | 99.1                       | $\pm 6.91$                                  |
| <b>0.493</b>                   | 87.2                       | $\pm 6.75$                                  |
| <b>0.586</b>                   | 78.2                       | $\pm 6.67$                                  |
| <b>0.771</b>                   | 64.5                       | $\pm 6.23$                                  |
| <b>0.957</b>                   | 55.3                       | $\pm 6.41$                                  |

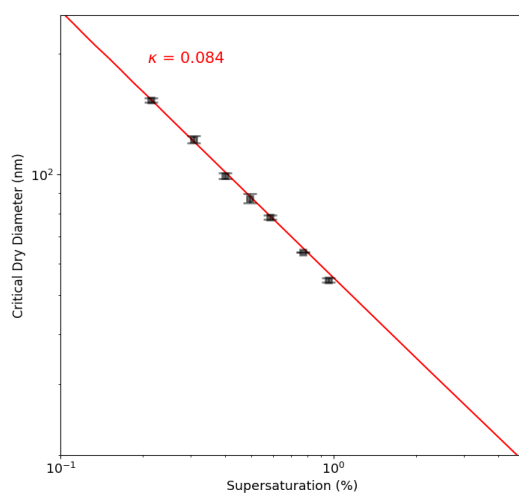

Figure S4. CCN measurements of sucrose from DMA-based setup. The activation measurements overlaid with  $\kappa = 0.084$  line which corresponds to pure (ideal) sucrose.

## Supplemental References

Crowder, T. M., Rosati, J. A., Schroeter, J. D., Hickey, A. J., & Martonen, T. B.: Fundamental effects of particle morphology on lung delivery: predictions of Stokes' law and the particular relevance to dry powder inhaler formulation and development, *pharmaceutical research*, 19, 239-245, 2002.

Johnson, T. J., Irwin, M., Symonds, J. P., Olfert, J. S., and Boies, A. M.: Measuring aerosol size distributions with the aerodynamic aerosol classifier, *Aerosol Science and Technology*, 52, 655–665, 2018.

Kim, J. H., Mulholland, G. W., Kukuck, S. R., and Pui, D. Y.: Slip correction measurements of certified PSL nanoparticles using a nanometer differential mobility analyzer (nano-DMA) for Knudsen number from 0.5 to 83, *Journal of Research of the National Institute of Standards and technology*, 110, 2005.

Moore, R. H., Nenes, A., and Medina, J.: Scanning mobility CCN analysis—A method for fast measurements of size-resolved CCN distributions and activation kinetics, *Aerosol Science and Technology*, 44, 861–871, 2010.

Petters, M. D. and Kreidenweis, S. M.: A single parameter representation of hygroscopic growth and cloud condensation nucleus activity, *Atmospheric Chemistry and Physics*, 7, 1961–1971, 2007.

Rose, D., Gunthe, S., Mikhailov, E., Frank, G., Dusek, U., Andreae, M. O., and Pöschl, U.: Calibration and measurement uncertainties of a continuous-flow cloud condensation nuclei counter (DMT-CCNC): CCN activation of ammonium sulfate and sodium chloride aerosol particles in theory and experiment, *Atmospheric Chemistry and Physics*, 8, 1153–1179, 2008.

Tavakoli, F. and Olfert, J. S.: Determination of particle mass, effective density, mass–mobility exponent, and dynamic shape factor using an aerodynamic aerosol classifier and a differential mobility analyzer in tandem, *Journal of aerosol science*, 75, 35–42, 2014.

Yao, Q., Asa-Awuku, A., Zangmeister, C. D., and Radney, J. G.: Comparison of three essential sub-micrometer aerosol measurements: Mass, size and shape, *Aerosol Science and Technology*, 54, 1197–1209, 2020.
